# Supplementary material for: Overexpression of a Water-Forming NADH Oxidase Improves the Metabolism and Stress Tolerance of Saccharomyces cerevisiae in Aerobic Fermentation
Source: Front Microbiol. 2016 Sep 13;7:1427. doi: 10.3389/fmicb.2016.01427 (PMC5020133; doi:10.3389/fmicb.2016.01427)
Supplement: ADDITIONAL FILE S4 — KEGG pathway analysis for CBP and NBP cells. [file Data_Sheet_4.XLSX]

## Sheet: CBP-vs-NBP
#	Pathway	DEGs with pathway annotation (735)	All genes with pathway annotation (3778)	Pvalue	Qvalue	Pathway ID
1	Ribosome	68 (9.25%)	153 (4.05%)	5.20427e-13	4.6318e-11	ko03010
2	Cell cycle - yeast	58 (7.89%)	167 (4.42%)	1.47005e-06	6.54171e-05	ko04111
3	MAPK signaling pathway - yeast	32 (4.35%)	86 (2.28%)	7.94195e-05	0.00235611	ko04011
4	Starch and sucrose metabolism	21 (2.86%)	62 (1.64%)	0.0049786	0.110774	ko00500
5	Glycolysis / Gluconeogenesis	20 (2.72%)	62 (1.64%)	0.011006	0.195907	ko00010
6	Meiosis - yeast	43 (5.85%)	163 (4.31%)	0.0169072	0.243547	ko04113
7	Propanoate metabolism	19 (2.59%)	61 (1.61%)	0.0191554	0.243547	ko00640
8	Methane metabolism	13 (1.77%)	38 (1.01%)	0.0227158	0.252714	ko00680
9	Peroxisome	14 (1.9%)	47 (1.24%)	0.0582704	0.560406	ko04146
10	Pentose phosphate pathway	10 (1.36%)	31 (0.82%)	0.062967	0.560406	ko00030
11	Valine, leucine and isoleucine degradation	16 (2.18%)	59 (1.56%)	0.094559	0.765068	ko00280
12	Glyoxylate and dicarboxylate metabolism	9 (1.22%)	31 (0.82%)	0.1318	0.91391	ko00630
13	Glycerolipid metabolism	8 (1.09%)	27 (0.71%)	0.137457	0.91391	ko00561
14	Steroid biosynthesis	6 (0.82%)	20 (0.53%)	0.177776	0.91391	ko00100
15	Biotin metabolism	3 (0.41%)	8 (0.21%)	0.191019	0.91391	ko00780
16	beta-Alanine metabolism	15 (2.04%)	61 (1.61%)	0.192828	0.91391	ko00410
17	Inositol phosphate metabolism	16 (2.18%)	66 (1.75%)	0.199274	0.91391	ko00562
18	ABC transporters	6 (0.82%)	21 (0.56%)	0.210546	0.91391	ko02010
19	Sphingolipid metabolism	4 (0.54%)	13 (0.34%)	0.235843	0.91391	ko00600
20	Homologous recombination	8 (1.09%)	31 (0.82%)	0.243726	0.91391	ko03440
21	Fatty acid metabolism	6 (0.82%)	22 (0.58%)	0.245212	0.91391	ko00071
22	alpha-Linolenic acid metabolism	2 (0.27%)	5 (0.13%)	0.251533	0.91391	ko00592
23	Arginine and proline metabolism	9 (1.22%)	36 (0.95%)	0.255241	0.91391	ko00330
24	Galactose metabolism	9 (1.22%)	36 (0.95%)	0.255241	0.91391	ko00052
25	Oxidative phosphorylation	21 (2.86%)	93 (2.46%)	0.256716	0.91391	ko00190
26	Citrate cycle (TCA cycle)	10 (1.36%)	42 (1.11%)	0.291523	0.933892	ko00020
27	Glutathione metabolism	7 (0.95%)	28 (0.74%)	0.294698	0.933892	ko00480
28	Biosynthesis of secondary metabolites	66 (8.98%)	319 (8.44%)	0.302376	0.933892	ko01110
29	Regulation of autophagy	5 (0.68%)	19 (0.5%)	0.304302	0.933892	ko04140
30	Metabolic pathways	172 (23.4%)	858 (22.71%)	0.325116	0.96451	ko01100
31	Glycine, serine and threonine metabolism	8 (1.09%)	35 (0.93%)	0.368739	0.999989	ko00260
32	Lysine biosynthesis	4 (0.54%)	16 (0.42%)	0.38001	0.999989	ko00300
33	Aminoacyl-tRNA biosynthesis	9 (1.22%)	41 (1.09%)	0.403056	0.999989	ko00970
34	Fatty acid biosynthesis	2 (0.27%)	8 (0.21%)	0.48071	0.999989	ko00061
35	Pyruvate metabolism	9 (1.22%)	46 (1.22%)	0.552115	0.999989	ko00620
36	Mismatch repair	5 (0.68%)	25 (0.66%)	0.552703	0.999989	ko03430
37	Amino sugar and nucleotide sugar metabolism	8 (1.09%)	41 (1.09%)	0.559414	0.999989	ko00520
38	Arachidonic acid metabolism	2 (0.27%)	10 (0.26%)	0.607809	0.999989	ko00590
39	Nitrogen metabolism	6 (0.82%)	32 (0.85%)	0.611316	0.999989	ko00910
40	Glycerophospholipid metabolism	8 (1.09%)	43 (1.14%)	0.617686	0.999989	ko00564
41	Pantothenate and CoA biosynthesis	4 (0.54%)	22 (0.58%)	0.645134	0.999989	ko00770
42	Ascorbate and aldarate metabolism	1 (0.14%)	5 (0.13%)	0.661217	0.999989	ko00053
43	Ether lipid metabolism	2 (0.27%)	11 (0.29%)	0.661885	0.999989	ko00565
44	Sulfur metabolism	3 (0.41%)	17 (0.45%)	0.670962	0.999989	ko00920
45	Endocytosis	12 (1.63%)	68 (1.8%)	0.695629	0.999989	ko04144
46	Phenylalanine, tyrosine and tryptophan biosynthesis	3 (0.41%)	18 (0.48%)	0.71005	0.999989	ko00400
47	SNARE interactions in vesicular transport	4 (0.54%)	24 (0.64%)	0.714989	0.999989	ko04130
48	Various types of N-glycan biosynthesis	6 (0.82%)	36 (0.95%)	0.728717	0.999989	ko00513
49	Fructose and mannose metabolism	8 (1.09%)	48 (1.27%)	0.743278	0.999989	ko00051
50	Porphyrin and chlorophyll metabolism	3 (0.41%)	19 (0.5%)	0.745464	0.999989	ko00860
51	Non-homologous end-joining	3 (0.41%)	19 (0.5%)	0.745464	0.999989	ko03450
52	Pentose and glucuronate interconversions	2 (0.27%)	13 (0.34%)	0.751886	0.999989	ko00040
53	Tyrosine metabolism	5 (0.68%)	32 (0.85%)	0.774707	0.999989	ko00350
54	Cyanoamino acid metabolism	3 (0.41%)	20 (0.53%)	0.777336	0.999989	ko00460
55	Thiamine metabolism	1 (0.14%)	7 (0.19%)	0.780368	0.999989	ko00730
56	Glycosylphosphatidylinositol(GPI)-anchor biosynthesis	4 (0.54%)	27 (0.71%)	0.799931	0.999989	ko00563
57	Tryptophan metabolism	4 (0.54%)	27 (0.71%)	0.799931	0.999989	ko00380
58	Phenylalanine metabolism	2 (0.27%)	15 (0.4%)	0.820453	0.999989	ko00360
59	Valine, leucine and isoleucine biosynthesis	2 (0.27%)	15 (0.4%)	0.820453	0.999989	ko00290
60	Natural killer cell mediated cytotoxicity	1 (0.14%)	8 (0.21%)	0.823176	0.999989	ko04650
61	Ubiquinone and other terpenoid-quinone biosynthesis	1 (0.14%)	8 (0.21%)	0.823176	0.999989	ko00130
62	mRNA surveillance pathway	9 (1.22%)	59 (1.56%)	0.838342	0.999989	ko03015
63	Alanine, aspartate and glutamate metabolism	5 (0.68%)	35 (0.93%)	0.839354	0.999989	ko00250
64	RNA degradation	13 (1.77%)	83 (2.2%)	0.847348	0.999989	ko03018
65	Base excision repair	3 (0.41%)	23 (0.61%)	0.853702	0.999989	ko03410
66	Phosphatidylinositol signaling system	3 (0.41%)	27 (0.71%)	0.919423	0.999989	ko04070
67	RNA polymerase	4 (0.54%)	34 (0.9%)	0.920283	0.999989	ko03020
68	Lysine degradation	2 (0.27%)	20 (0.53%)	0.923531	0.999989	ko00310
69	Nicotinate and nicotinamide metabolism	1 (0.14%)	12 (0.32%)	0.925759	0.999989	ko00760
70	N-Glycan biosynthesis	4 (0.54%)	35 (0.93%)	0.930725	0.999989	ko00510
71	Purine metabolism	20 (2.72%)	136 (3.6%)	0.941649	0.999989	ko00230
72	Ubiquitin mediated proteolysis	7 (0.95%)	57 (1.51%)	0.946143	0.999989	ko04120
73	DNA replication	4 (0.54%)	37 (0.98%)	0.947984	0.999989	ko03030
74	Folate biosynthesis	1 (0.14%)	14 (0.37%)	0.951913	0.999989	ko00790
75	Basal transcription factors	4 (0.54%)	38 (1.01%)	0.955048	0.999989	ko03022
76	RNA transport	14 (1.9%)	103 (2.73%)	0.955589	0.999989	ko03013
77	Cysteine and methionine metabolism	4 (0.54%)	39 (1.03%)	0.961218	0.999989	ko00270
78	Linoleic acid metabolism	2 (0.27%)	24 (0.64%)	0.962642	0.999989	ko00591
79	Histidine metabolism	2 (0.27%)	24 (0.64%)	0.962642	0.999989	ko00340
80	Butanoate metabolism	3 (0.41%)	35 (0.93%)	0.977721	0.999989	ko00650
81	Proteasome	3 (0.41%)	37 (0.98%)	0.984085	0.999989	ko03050
82	Terpenoid backbone biosynthesis	1 (0.14%)	20 (0.53%)	0.986953	0.999989	ko00900
83	One carbon pool by folate	1 (0.14%)	20 (0.53%)	0.986953	0.999989	ko00670
84	Spliceosome	9 (1.22%)	88 (2.33%)	0.994003	0.999989	ko03040
85	Nucleotide excision repair	3 (0.41%)	43 (1.14%)	0.994359	0.999989	ko03420
86	Pyrimidine metabolism	8 (1.09%)	85 (2.25%)	0.996583	0.999989	ko00240
87	Phagosome	3 (0.41%)	47 (1.24%)	0.99723	0.999989	ko04145
88	Ribosome biogenesis in eukaryotes	7 (0.95%)	80 (2.12%)	0.99758	0.999989	ko03008
89	Protein processing in endoplasmic reticulum	7 (0.95%)	114 (3.02%)	0.999989	0.999989	ko04141
#	Pathway	Differentially expressed genes
1	Ribosome	YOL120C, YOR063W, YLR367W, YLR061W, YBR189W, YNL301C, YGL030W, YDR064W, YPL198W, YLR167W, YNL178W, YLR029C, YDR012W, YLR406C, YGL076C, YKL006W, YGL147C, YCR031C, YGL123W, YFR032C-A, YPR043W, YLR264W, YHL015W, YLR075W, YGL031C, YPR102C, YJL189W, YDR382W, YIL148W, YLR340W, YHR021C, YLL045C, YGL103W, YLR185W, YBR031W, YGL189C, YPR132W, YBL027W, YBR084C-A, YDL083C, YOR182C, YDL081C, YIL018W, YMR142C,…
2	Cell cycle - yeast	YPR162C, YML027W, YGR052W, YBL084C, YPR119W, YJL194W, YKR091W, YDL127W, YAL040C, YHR071W, YJL056C, YGL190C, YOR195W, YMR199W, YIL046W, YHR152W, YLR182W, YLR210W, YDL003W, YAL024C, YMR001C, YFL034C-B, YFR034C, YJL157C, YDR451C, YKL101W, YGL003C, YMR043W, YMR036C, YJL057C, YOL001W, YML064C, YER111C, YDR146C, YER066W, YLR176C, YAR019C, YJL187C, YGR108W, YBL023C, YIL026C, YCL061C, YDL056W, YNL289W, Y…
3	MAPK signaling pathway - yeast	YCL027W, YBR083W, YHL028W, YHR084W, YPL187W, YGR023W, YPL230W, YOL105C, YKL062W, YJL056C, YFL026W, YPL089C, YKR055W, YNL180C, YHR030C, YLR182W, YGL089C, YLR332W, YDR256C, YJL157C, YMR043W, YIL113W, YOR231W, YER111C, YOR008C, YLR371W, YCR073C, YNL090W, YAL041W, YNL283C, YDL159W, YKL161C
4	Starch and sucrose metabolism	YMR244W, YGR279C, YKL127W, YIL099W, YBR299W, YPR026W, YFR015C, YOL084W, YBR297W, YBR001C, YJL216C, YLR446W, YFL052W, YMR305C, YLR300W, YEL011W, YJR153W, YPR184W, YPR160W, YMR278W, YIL123W
5	Glycolysis / Gluconeogenesis	YCR012W, YKL152C, YGR192C, YKL060C, YMR318C, YHR174W, YOL086C, YLR044C, YAL038W, YGR254W, YJR009C, YJL052W, YKL127W, YMR303C, YAL054C, YLR446W, YMR278W, YOR374W, YLR377C, YMR323W
6	Meiosis - yeast	YPR162C, YDR218C, YKL043W, YGR052W, YBL084C, YPR119W, YHR092C, YJL194W, YGR225W, YAL040C, YBR045C, YOR073W, YKL062W, YJL056C, YDL079C, YOR195W, YMR199W, YHR152W, YLR182W, YIL072W, YLR210W, YDL199C, YMR001C, YLR263W, YJL057C, YDR310C, YER111C, YAR019C, YHR184W, YJL187C, YGR108W, YBL023C, YIL026C, YOR351C, YOR313C, YDL035C, YDR536W, YPL153C, YFR028C, YEL032W, YER173W, YDR342C, YJL164C
7	Propanoate metabolism	YNR016C, YDR261W-B, YLR410W-B, YDR098C-B, YGR038C-B, YPR137C-B, YAL054C, YLR035C-A, YDL117W, YFL002W-A, YJR027W, YOL103W-B, YPR002W, YBL005W-B, YOR374W, YML045W, YDR210C-D, YER160C, YGR019W
8	Methane metabolism	YKL152C, YKL060C, YHR174W, YGR254W, YGR208W, YER081W, YOR388C, YFL053W, YDR256C, YAL054C, YNL274C, YLR377C, YMR323W
9	Peroxisome	YJR101W, YAR035W, YML042W, YLR174W, YER024W, YIL009W, YDR256C, YDR142C, YNL009W, YER015W, YKL188C, YOR292C, YNL202W, YMR018W
10	Pentose phosphate pathway	YKL060C, YLR354C, YKL127W, YGR256W, YCR036W, YGR248W, YNL274C, YBR117C, YMR278W, YLR377C
11	Valine, leucine and isoleucine degradation	YDR261W-B, YLR410W-B, YIL160C, YDR098C-B, YGR038C-B, YPR137C-B, YLR035C-A, YFL002W-A, YJR027W, YOL103W-B, YBL005W-B, YOR374W, YML045W, YDR210C-D, YER160C, YGR019W
12	Glyoxylate and dicarboxylate metabolism	YOL126C, YOR388C, YER065C, YDR256C, YCR005C, YPR001W, YLR304C, YNL274C, YPR035W
13	Glycerolipid metabolism	YMR318C, YKR067W, YMR165C, YHL032C, YFL053W, YOR374W, YOR081C, YCR068W
14	Steroid biosynthesis	YMR202W, YGL012W, YLR100W, YNR019W, YCR048W, YOR081C
15	Biotin metabolism	YNR058W, YNR057C, YGR286C
16	beta-Alanine metabolism	YDR261W-B, YLR410W-B, YDR098C-B, YGR038C-B, YPR137C-B, YLR035C-A, YFL002W-A, YJR027W, YOL103W-B, YBL005W-B, YOR374W, YML045W, YDR210C-D, YER160C, YGR019W
17	Inositol phosphate metabolism	YDR261W-B, YLR410W-B, YDR098C-B, YGR038C-B, YPR137C-B, YGL023C, YDR208W, YLR035C-A, YFL002W-A, YJR027W, YOL103W-B, YDR313C, YBL005W-B, YML045W, YDR210C-D, YER160C
18	ABC transporters	YOR153W, YDR406W, YKL209C, YPL058C, YOR011W, YKL188C
19	Sphingolipid metabolism	YKL008C, YBR265W, YDR062W, YBR183W
20	Homologous recombination	YMR279C, YML032C, YMR190C, YGL163C, YGR224W, YER095W, YLR234W, YDR363W-A
21	Fatty acid metabolism	YOL086C, YIL160C, YMR303C, YIL009W, YER015W, YOR374W
22	alpha-Linolenic acid metabolism	YIL160C, YOR081C
23	Arginine and proline metabolism	YOR323C, YPL111W, YHR033W, YLR438W, YJL088W, YHR018C, YER069W, YOR374W, YPR035W
24	Galactose metabolism	YKL127W, YBR299W, YBR297W, YJL216C, YLR446W, YFL052W, YBR020W, YIL130W, YMR278W
25	Oxidative phosphorylation	YGR001C, YGL008C, YDL085W, YFR033C, YHR051W, YML081C-A, YPR191W, YBR039W, YLL041C, YJL045W, YEL024W, YOR065W, YGR183C, YML120C, YMR256C, YBL099W, YGL187C, YKL148C, YDR178W, YDL004W, YBL045C
26	Citrate cycle (TCA cycle)	YOL126C, YLR174W, YCR005C, YPR001W, YLL041C, YNL009W, YJL045W, YLR304C, YKL148C, YDR178W
27	Glutathione metabolism	YBR244W, YLR174W, YER070W, YIL066C, YLR108C, YGR256W, YNL009W
28	Biosynthesis of secondary metabolites (no map in kegg database)	YBR249C, YCR012W, YKL152C, YGR192C, YKL060C, YMR318C, YHR174W, YOL086C, YLR044C, YHR216W, YLR354C, YAL038W, YMR244W, YLR286C, YGR254W, YJR009C, YJL052W, YDR321W, YDR127W, YGL245W, YDR502C, YGL012W, YLR180W, YKL127W, YLR359W, YER086W, YOL126C, YPL111W, YLR355C, YLR174W, YIL160C, YIR034C, YHR137W, YLR307W, YMR303C, YLR438W, YDR371W, YJL088W, YDR256C, YCR005C, YHR018C, YPR001W, YAL054C, YLR446W, YGR…
29	Regulation of autophagy	YLL042C, YPL149W, YNL223W, YJL057C, YPR185W
30	Metabolic pathways (no map in kegg database)	YEL021W, YBR249C, YCR012W, YKL152C, YGR192C, YKL060C, YGR001C, YMR318C, YHR174W, YOL086C, YLR044C, YHR216W, YER043C, YLR354C, YAL038W, YMR244W, YGR254W, YJR009C, YJL052W, YCL050C, YMR202W, YNR016C, YDL182W, YDR321W, YJR025C, YGL027C, YDR127W, YGR208W, YGL245W, YDR502C, YGL012W, YLR180W, YDR437W, YOR323C, YKL008C, YKL127W, YKL182W, YML022W, YLR359W, YLR100W, YER086W, YDR261W-B, YHR025W, YOL126C, Y…
31	Glycine, serine and threonine metabolism	YKL152C, YGR208W, YER086W, YHR025W, YER081W, YDR232W, YNL274C, YMR189W
32	Lysine biosynthesis	YDL182W, YIR034C, YMR279C, YDR234W
33	Aminoacyl-tRNA biosynthesis	YBR121C, YHR011W, YGL245W, YOL097C, YDR268W, YDR037W, YIL078W, YGR094W, YDR341C
34	Fatty acid biosynthesis	YNR016C, YKL182W
35	Pyruvate metabolism	YAL038W, YNR016C, YDL182W, YOL126C, YAL054C, YBL015W, YNL274C, YML054C, YOR374W
36	Mismatch repair	YCR092C, YDR263C, YBR088C, YHR120W, YDL164C
37	Amino sugar and nucleotide sugar metabolism	YLR286C, YKL127W, YLR307W, YDR371W, YBR023C, YLR446W, YBR020W, YMR278W
38	Arachidonic acid metabolism	YBR244W, YOR081C
39	Nitrogen metabolism	YDR321W, YNL036W, YJR149W, YEL024W, YOR065W, YPR035W
40	Glycerophospholipid metabolism	YIL155C, YKR067W, YMR165C, YOL011W, YGR110W, YIL124W, YDL022W, YOR081C
41	Pantothenate and CoA biosynthesis	YLR355C, YKR072C, YOR054C, YKL088W
42	Ascorbate and aldarate metabolism	YOR374W
43	Ether lipid metabolism	YIL124W, YOR081C
44	Sulfur metabolism	YCL050C, YFR030W, YJR137C
45	Endocytosis	YER047C, YGL023C, YDR208W, YLR206W, YJR125C, YPR173C, YCL008C, YLR025W, YDR524C, YBL060W, YLR181C, YDR358W
46	Phenylalanine, tyrosine and tryptophan biosynthesis	YBR249C, YDR127W, YHR137W
47	SNARE interactions in vesicular transport	YMR017W, YOR327C, YMR197C, YAL014C
48	Various types of N-glycan biosynthesis	YJL186W, YOR085W, YGL038C, YBR161W, YEL036C, YML115C
49	Fructose and mannose metabolism	YKL060C, YNR073C, YEL070W, YJR155W, YIL107C, YLR446W, YJR110W, YLR377C
50	Porphyrin and chlorophyll metabolism	YGL245W, YDR232W, YKR069W
51	Non-homologous end-joining	YMR279C, YGR224W, YMR284W
52	Pentose and glucuronate interconversions	YJR153W, YOR374W
53	Tyrosine metabolism	YOL086C, YJL218W, YHR137W, YMR303C, YPR193C
54	Cyanoamino acid metabolism	YMR244W, YDR321W, YIL123W
55	Thiamine metabolism	YPR121W
56	Glycosylphosphatidylinositol(GPI)-anchor biosynthesis	YDR437W, YJL132W, YFL025C, YLR459W
57	Tryptophan metabolism	YJR025C, YJR078W, YDR256C, YOR374W
58	Phenylalanine metabolism	YHR137W, YDR380W
59	Valine, leucine and isoleucine biosynthesis	YER086W, YLR355C
60	Natural killer cell mediated cytotoxicity	YDR373W
61	Ubiquinone and other terpenoid-quinone biosynthesis	YOR125C
62	mRNA surveillance pathway	YDR501W, YGL190C, YOL123W, YBL049W, YDR381W, YFR023W, YKL186C, YMR268C, YLR183C
63	Alanine, aspartate and glutamate metabolism	YDR321W, YLR359W, YHR018C, YPR035W, YGR019W
64	RNA degradation	YHR174W, YGR254W, YEL007W, YNR052C, YBR241C, YIL038C, YOR173W, YFR023W, YLR270W, YJR022W, YMR268C, YMR323W, YER146W
65	Base excision repair	YKL032C, YBR088C, YDL164C
66	Phosphatidylinositol signaling system	YGL023C, YDR208W, YDR313C
67	RNA polymerase	YOR224C, YDL199C, YHR143W-A, YDR404C
68	Lysine degradation	YIR034C, YOR374W
69	Nicotinate and nicotinamide metabolism	YPL188W
70	N-Glycan biosynthesis	YGL027C, YOR085W, YMR196W, YGR227W
71	Purine metabolism	YHR216W, YAL038W, YCL050C, YNL217W, YKL127W, YML022W, YLR359W, YER047C, YER070W, YOR224C, YIL066C, YOR360C, YDL199C, YHR143W-A, YGR224W, YIR032C, YDR040C, YDL238C, YMR278W, YDR404C
72	Ubiquitin mediated proteolysis	YBL084C, YIL046W, YDR409W, YGL003C, YER066W, YDR059C, YOR339C
73	DNA replication	YBR088C, YBL023C, YDL164C, YEL032W
74	Folate biosynthesis	YPL170W
75	Basal transcription factors	YOR194C, YKL121W, YIL143C, YKL028W
76	RNA transport	YBR118W, YPR080W, YKR059W, YLR293C, YDR501W, YDR381W, YGL172W, YFR023W, YMR047C, YOR185C, YKL186C, YMR268C, YLR183C, YOR098C
77	Cysteine and methionine metabolism	YER043C, YDR502C, YLR180W, YER086W
78	Linoleic acid metabolism	YJR155W, YOR081C
79	Histidine metabolism	YOR202W, YOR374W
80	Butanoate metabolism	YJR155W, YNL335W, YGR019W
81	Proteasome	YIL042C, YOL038W, YDR363W-A
82	Terpenoid backbone biosynthesis	YMR101C
83	One carbon pool by folate	YPL170W
84	Spliceosome	YHR009C, YLR117C, YDR381W, YAL032C, YJR022W, YPR101W, YMR268C, YER146W, YDR088C
85	Nucleotide excision repair	YBR088C, YDL164C, YIL143C
86	Pyrimidine metabolism	YEL021W, YER070W, YOR224C, YIL066C, YDL199C, YHR143W-A, YKL216W, YDR404C
87	Phagosome	YGL023C, YDR313C, YDR358W
88	Ribosome biogenesis in eukaryotes	YLR106C, YLR293C, YLR107W, YMR093W, YLL034C, YOR185C, YKL186C
89	Protein processing in endoplasmic reticulum	YGL027C, YOR085W, YML101C, YMR196W, YDR059C, YPL096W, YBL058W
